# Supplementary material for: Comprehensive Identification and Characterization of Long Non-coding RNAs Associated With Rice Black-Streaked Dwarf Virus Infection in Laodelphax striatellus (Fallén) Midgut
Source: Front Physiol. 2020 Aug 12;11:1011. doi: 10.3389/fphys.2020.01011 (PMC7437459; doi:10.3389/fphys.2020.01011)
Supplement: TABLE S5 — The data of 169 mRNA transcripts which were differentially expressed after RBSDV infection in L. striatellus midgut. [file Table_5.XLSX]

## Sheet: Sheet2
Table S5. The data of 169 mRNA transcripts which were differentially expressed after RBSDV infection in L. striatellus midgut.
Gene id	Gene name	Chr	Strand	Start	End	Exons	Length	GO	KEGG	KO ENTRY	EC	Description	FPKM (RB1)	FPKM (RB2)	FPKM (RB3)	FPKM (VF1)	FPKM (VF2)	FPKM (VF3)	log2(fc)	P value	Q value	Regulation	Significant
MSTRG.158	evm.TU.Contig0.107	chrContig0	+	1731689	1742500	6	3483	NA	NA	NA	NA	PREDICTED: uncharacterized protein LOC105842288 [Bombyx mori]	3.07036	2.59544	5.12907	2.96575	0.185239	5.11385	1.36155	0.0162472	0.779997	up	yes
MSTRG.1093	evm.TU.Contig100.138	chrContig100	+	3245786	3386015	26	7506	NA	NA	NA	NA	PREDICTED: LOW QUALITY PROTEIN: zinc finger protein castor homolog 1-like [Tribolium castaneum]	1.03092	1.54429	1.47168	0.102455	0	0	1.17518	0.00426975	0.691825	up	yes
MSTRG.1945	evm.TU.Contig108.60	chrContig108	-	1180344	1182254	2	886	NA	NA	NA	NA	PREDICTED: uncharacterized protein LOC100578801 [Apis mellifera]	2.36704	2.28633	3.3747	0.56629	0.616237	2.26855	1.17251	0.0342958	0.779997	up	yes
MSTRG.2697	evm.TU.Contig112.63	chrContig112	-	1361985	1373764	9	1434	NA	00564(Glycerophospholipid metabolism);05231(Choline metabolism in cancer)	K14156	EC:2.7.1.32 2.7.1.82	PREDICTED: choline/ethanolamine kinase isoform X2 [Plutella xylostella]	28.844	39.2722	36.4628	3.30655	3.87575	3.85349	2.89724	0.000575786	0.46978	up	yes
MSTRG.2700	evm.TU.Contig112.66_evm.TU.Contig112.69	chrContig112	-	1407735	1483019	10	2755	NA	00310(Lysine degradation)	K19199	EC:2.1.1.43	SET domain-containing protein 3 [Zootermopsis nevadensis]	16.507	16.0033	5.34993	0	0	0	3.39401	0.0098227	0.741915	up	yes
MSTRG.3302	evm.TU.Contig117.24	chrContig117	-	487123	490683	3	711	GO:0005484(SNAP receptor activity);GO:0006888(ER to Golgi vesicle-mediated transport);GO:0016192(vesicle-mediated transport);GO:0019905(syntaxin binding);GO:0022008(neurogenesis);GO:0031201(SNARE complex)	04130(SNARE interactions in vesicular transport)	K08504	NA	BET1-like protein [Zootermopsis nevadensis]	8.57874	4.9742	22.8502	8.36835	2.77287	15.9358	1.34555	0.0173104	0.779997	up	yes
MSTRG.3526	evm.TU.Contig1210.1	chrContig1210	-	18533	18712	1	180	GO:0003333(amino acid transmembrane transport);GO:0015171(amino acid transmembrane transporter activity)	04138(Autophagy - yeast)	K14209	NA	GI21155 [Drosophila mojavensis]	3.21809	1.54857	1.96329	0.804933	0	2.51485	1.31972	0.0469082	0.779997	up	yes
MSTRG.3848	evm.TU.Contig123.82	chrContig123	-	1659926	1687606	21	4392	GO:0004012(phospholipid-translocating ATPase activity);GO:0005886(plasma membrane)	NA	K01530	EC:3.6.3.1	putative phospholipid-transporting ATPase VD, partial [Zootermopsis nevadensis]	1.83015	6.68067	2.89542	0	0	0	1.95963	0.0336625	0.779997	up	yes
MSTRG.5010	evm.TU.Contig13.449_evm.TU.Contig13.450	chrContig13	+	9023977	9157947	6	1730	NA	04010(MAPK signaling pathway);04014(Ras signaling pathway);04015(Rap1 signaling pathway);04151(PI3K-Akt signaling pathway);04510(Focal adhesion);05200(Pathways in cancer)	K16859	NA	hypothetical protein [Riptortus pedestris]	15.2302	11.1421	7.65789	4.01389	4.25746	3.47742	1.1459	0.0376602	0.779997	up	yes
MSTRG.5237	evm.TU.Contig136.9	chrContig136	+	148802	191315	17	2810	NA	NA	K19015	NA	inter-alpha-trypsin inhibitor heavy chain H4 precursor [Nilaparvata lugens]	22.5236	19.447	9.9039	4.17312	4.35355	5.3956	1.54392	0.0437662	0.779997	up	yes
MSTRG.5797	evm.TU.Contig14.57	chrContig14	+	937296	953266	16	3221	NA	00511(Other glycan degradation);04142(Lysosome)	K01192	EC:3.2.1.25	Beta-mannosidase [Zootermopsis nevadensis]	24.9081	23.2672	29.9828	17.41	0.217517	28.0473	3.04631	0.0491623	0.779997	up	yes
MSTRG.5813	evm.TU.Contig14.63	chrContig14	-	1003113	1014424	7	1195	NA	NA	K09640	EC:3.4.21.-	serine protease 7 [Nilaparvata lugens]	946.121	852.196	541.341	293.781	290.414	294.46	1.26937	0.0255225	0.779997	up	yes
MSTRG.5850	evm.TU.Contig14.104	chrContig14	-	1735010	1857221	19	2950	NA	NA	NA	NA	PREDICTED: phosphofurin acidic cluster sorting protein 1 isoform X2 [Acyrthosiphon pisum]	5.19352	2.61123	4.93377	1.55866	0.423485	0.831492	1.69782	0.0170231	0.779997	up	yes
MSTRG.5982	evm.TU.Contig14.173	chrContig14	+	4007249	4018543	11	2167	NA	NA	K05312	NA	PREDICTED: neuronal acetylcholine receptor subunit beta-3-like isoform X3 [Tribolium castaneum]	54.1674	51.822	31.3254	13.1898	15.6697	12.1887	1.42536	0.010924	0.74814	up	yes
MSTRG.6611	evm.TU.Contig1498.4	chrContig1498	+	38218	44984	6	1078	NA	00981(Insect hormone biosynthesis)	K10721	NA	cytochrome P450 CYP302A1 [Laodelphax striatella]	15.1431	13.7808	7.64134	2.76896	2.90828	3.19558	1.58337	0.0216906	0.779997	up	yes
MSTRG.6967	evm.TU.Contig157.9	chrContig157	+	162951	165217	2	411	NA	NA	NA	NA	PREDICTED: uncharacterized protein LOC100575112 [Acyrthosiphon pisum]	4.64269	3.9957	3.91261	1.20436	0	3.16542	1.87997	0.0216578	0.779997	up	yes
MSTRG.7100	evm.TU.Contig157.104	chrContig157	+	2469693	2480924	4	2453	NA	NA	K09515	NA	Zgc:110447 [Danio rerio]	40.2662	32.6424	32.4792	23.8592	9.41426	25.5643	1.32478	0.0339462	0.779997	up	yes
MSTRG.7471	evm.TU.Contig162.20	chrContig162	-	343096	344477	1	1382	NA	04141(Protein processing in endoplasmic reticulum);04213(Longevity regulating pathway - multiple species)	K09542	NA	putative small heat shock protein [Maconellicoccus hirsutus]	6.09857	3.9036	29.9998	3.47729	0	15.9864	2.86072	0.00768999	0.734888	up	yes
MSTRG.8079	evm.TU.Contig16849.1	chrContig16849	+	380	1561	1	1182	NA	NA	NA	NA	NA	5.01419	4.36116	5.69041	0	0	0	2.63861	0.000137917	0.313497	up	yes
MSTRG.8772	evm.TU.Contig17296.4	chrContig17296	-	4633	10450	3	1146	NA	NA	NA	NA	NA	349.304	19.4353	514.405	246.264	4.54664	427.873	3.54936	0.037009	0.779997	up	yes
MSTRG.9002	evm.TU.Contig175.83	chrContig175	-	1978280	1991329	13	2755	NA	00310(Lysine degradation)	K11432	NA	PREDICTED: uncharacterized protein LOC105147993 isoform X3 [Acromyrmex echinatior]	2.61484	2.97784	3.48502	1.36251	0	1.41808	1.57699	0.0141804	0.778996	up	yes
MSTRG.9115	evm.TU.Contig1768.2	chrContig1768	-	6305	14645	5	1208	GO:0005634(nucleus);GO:0015630(microtubule cytoskeleton)	04110(Cell cycle);04152(AMPK signaling pathway);04218(Cellular senescence);04914(Progesterone-mediated oocyte maturation);05161(Hepatitis B);05165(Human papillomavirus infection);05169(Epstein-Barr virus infection);05203(Viral carcinogenesis)	K06627	NA	G2/mitotic-specific cyclin-A [Zootermopsis nevadensis]	4.88774	2.93077	9.89211	4.23722	1.55888	6.31242	1.13706	0.010672	0.746362	up	yes
MSTRG.9116	evm.TU.Contig1768.3	chrContig1768	-	15944	23330	3	3031	GO:0000118(histone deacetylase complex);GO:0003714(transcription corepressor activity)	NA	K19202	NA	Histone deacetylase complex subunit SAP30-like protein [Zootermopsis nevadensis]	4.29538	2.10379	7.92546	2.94088	0.976612	5.44337	1.25518	0.0048745	0.709376	up	yes
MSTRG.9263	evm.TU.Contig18.48	chrContig18	+	767038	775114	6	3448	GO:0005506(iron ion binding);GO:0005654(nucleoplasm);GO:0005739(mitochondrion);GO:0006749(glutathione metabolic process)	00920(Sulfur metabolism)	K17725	EC:1.13.11.18	beta lactamase domain [Riptortus pedestris]	28.9423	21.7079	20.8018	10.4658	8.78439	11.5131	1.22867	0.00966484	0.741915	up	yes
MSTRG.10115	evm.TU.Contig192.12	chrContig192	+	301331	338481	10	5573	GO:0000278(mitotic cell cycle);GO:0004702(receptor signaling protein serine/threonine kinase activity);GO:0005737(cytoplasm);GO:0006915(apoptotic process);GO:0045595(regulation of cell differentiation)	NA	K08838	EC:2.7.11.1	PREDICTED: serine/threonine-protein kinase MST4 isoform X1 [Tribolium castaneum]	36.724	26.914	63.7503	36.4167	5.05764	37.6543	1.99845	0.0216178	0.779997	up	yes
MSTRG.10436	evm.TU.Contig196.21	chrContig196	-	288520	294552	6	1404	NA	04217(Necroptosis);04621(NOD-like receptor signaling pathway)	K10630	EC:2.3.2.27	RanBP-type and C3HC4-type zinc finger-containing protein 1 [Zootermopsis nevadensis]	11.5358	11.0253	10.3761	0.052402	0.075886	0.104443	3.4691	1.13475e-05	0.229473	up	yes
MSTRG.11066	evm.TU.Contig20.206	chrContig20	-	4949784	4958521	6	2650	NA	NA	NA	NA	Protein Star [Zootermopsis nevadensis]	3.95749	1.24489	5.72951	0.005097	0	0	2.34549	0.0225731	0.779997	up	yes
MSTRG.11161	evm.TU.Contig201.20	chrContig201	+	390440	499551	11	7552	NA	04022(cGMP - PKG signaling pathway);04024(cAMP signaling pathway);04151(PI3K-Akt signaling pathway);04152(AMPK signaling pathway);04211(Longevity regulating pathway - mammal);04261(Adrenergic signaling in cardiomyocytes);04668(TNF signaling pathway);04725(Cholinergic synapse);04728(Dopaminergic synapse);04911(Insulin secretion);04915(Estrogen signaling pathway);04916(Melanogenesis);04918(Thyroid …	K09048	NA	PREDICTED: cyclic AMP response element-binding protein A-like isoform X1 [Tribolium castaneum]	37.8436	15.9213	38.81	18.6733	10.1225	27.4829	1.28887	0.0185748	0.779997	up	yes
MSTRG.11813	evm.TU.Contig2104.1	chrContig2104	-	3709	12525	5	804	NA	04612(Antigen processing and presentation);05152(Tuberculosis);05168(Herpes simplex infection)	K06505	NA	PREDICTED: SPARC-related modular calcium-binding protein 2 isoform X2 [Megachile rotundata]	18.8762	9.9387	9.45621	1.64623	1.35041	2.77475	2.37772	0.0119583	0.757917	up	yes
MSTRG.12373	evm.TU.Contig22195.2	chrContig22195	+	8307	13604	3	354	GO:0003735(structural constituent of ribosome);GO:0006412(translation)	NA	K15085	NA	PREDICTED: mitochondrial coenzyme A transporter SLC25A42 [Athalia rosae]	2.11585	2.64049	4.39515	1.18402	0.817819	0.552591	1.15115	0.049935	0.779997	up	yes
MSTRG.12522	evm.TU.Contig223.69	chrContig223	-	1195212	1206042	9	3104	NA	00532(Glycosaminoglycan biosynthesis - chondroitin sulfate / dermatan sulfate)	K00747	EC:2.4.1.175 2.4.1.226	Chondroitin sulfate synthase 2 [Zootermopsis nevadensis]	6.34519	2.55904	5.5009	3.33264	0	8.00606	1.76815	0.0260763	0.779997	up	yes
MSTRG.12644	evm.TU.Contig224.93	chrContig224	+	1607551	1616161	7	2549	GO:0005783(endoplasmic reticulum);GO:0005875(microtubule associated complex);GO:0008201(heparin binding);GO:0012505(endomembrane system);GO:0050750(low-density lipoprotein particle receptor binding)	NA	NA	NA	Alpha-2-macroglobulin receptor-associated protein [Zootermopsis nevadensis]	38.0741	23.6229	43.8053	21.1505	15.5811	25.1992	1.05761	0.00956544	0.741915	up	yes
MSTRG.12665	evm.TU.Contig224.120	chrContig224	+	2102696	2105363	2	1270	NA	NA	NA	NA	unknown secreted protein [Riptortus pedestris]	479.144	466.072	393.572	183.123	160.491	223.94	1.33245	0.00611059	0.715054	up	yes
MSTRG.12920	evm.TU.Contig22695.1	chrContig22695	+	157	514	1	358	NA	NA	NA	NA	NA	10.3184	9.15982	7.09795	0	1.16711	0	2.52528	0.0025478	0.590127	up	yes
MSTRG.13462	evm.TU.Contig2396.1	chrContig2396	+	1332	4405	3	714	GO:0005515(protein binding);GO:0014069(postsynaptic density);GO:0030160(GKAP/Homer scaffold activity);GO:0097107(postsynaptic density assembly)	04724(Glutamatergic synapse)	K15009	NA	hypothetical protein KGM_19203 [Danaus plexippus]	9.55446	8.82485	9.61258	6.85936	1.50293	9.86302	1.42545	0.0428528	0.779997	up	yes
MSTRG.13526	evm.TU.Contig241.21	chrContig241	-	626515	644786	6	4128	NA	NA	NA	NA	hypothetical protein L798_00578 [Zootermopsis nevadensis]	20.1717	13.3183	13.6768	7.80739	5.02408	11.777	1.21755	0.0303286	0.779997	up	yes
MSTRG.13648	evm.TU.Contig24667.1	chrContig24667	+	816	2662	2	327	GO:0005388(calcium-transporting ATPase activity);GO:0005509(calcium ion binding);GO:0005622(intracellular);GO:0005886(plasma membrane);GO:0005887(integral component of plasma membrane);GO:0006810(transport);GO:0007601(visual perception);GO:0007602(phototransduction);GO:0007603(phototransduction, visible light);GO:0007608(sensory perception of smell);GO:0008525(phosphatidylcholine transporter acti…	NA	K13619	EC:3.1.1.-	Protein retinal degeneration B [Zootermopsis nevadensis]	5.09222	3.78908	2.33136	0.038814	0.246911	0	1.89966	0.00764958	0.734888	up	yes
MSTRG.14051	evm.TU.Contig25.193	chrContig25	-	3621913	3641175	11	4590	GO:0002121(inter-male aggressive behavior);GO:0003979(UDP-glucose 6-dehydrogenase activity);GO:0006024(glycosaminoglycan biosynthetic process);GO:0007166(cell surface receptor signaling pathway);GO:0007224(smoothened signaling pathway);GO:0007367(segment polarity determination);GO:0007427(epithelial cell migration, open tracheal system);GO:0007428(primary branching, open tracheal system);GO:00074…	00040(Pentose and glucuronate interconversions);00053(Ascorbate and aldarate metabolism);00520(Amino sugar and nucleotide sugar metabolism)	K00012	EC:1.1.1.22	PREDICTED: UDP-glucose 6-dehydrogenase [Apis florea]	53.6715	36.4348	32.2026	15.0165	14.5658	19.2483	1.32472	0.0251003	0.779997	up	yes
MSTRG.14138	evm.TU.Contig250.27	chrContig250	-	458155	469483	7	1544	GO:0003735(structural constituent of ribosome);GO:0006412(translation)	NA	K15101	NA	PREDICTED: mitochondrial ornithine transporter 1 isoform X2 [Bombyx mori]	3.84069	4.88615	2.99517	1.3161	1.06561	0.338463	1.13912	0.0216287	0.779997	up	yes
MSTRG.14914	evm.TU.Contig26.150	chrContig26	+	3285276	3290993	4	717	NA	04974(Protein digestion and absorption)	K16628	NA	putative secreted protease inhibitor [Ixodes scapularis]	4.05184	2.91965	5.53654	0.678154	0.102847	1.2007	2.07075	2.53828e-05	0.229473	up	yes
MSTRG.15367	evm.TU.Contig266.55	chrContig266	-	1078103	1091009	13	1836	GO:0000226(microtubule cytoskeleton organization);GO:0001782(B cell homeostasis);GO:0005813(centrosome);GO:0005819(spindle);GO:0030865(cortical cytoskeleton organization);GO:0043029(T cell homeostasis);GO:0045579(positive regulation of B cell differentiation)	03015(mRNA surveillance pathway);04071(Sphingolipid signaling pathway);04151(PI3K-Akt signaling pathway);04152(AMPK signaling pathway);04261(Adrenergic signaling in cardiomyocytes);04728(Dopaminergic synapse);05165(Human papillomavirus infection)	K11583	NA	PREDICTED: LOW QUALITY PROTEIN: actin-binding protein anillin-like [Apis dorsata]	9.15036	7.41652	9.8789	7.72592	2.00314	7.21316	1.211	0.0354647	0.779997	up	yes
MSTRG.15473	evm.TU.Contig27057.1	chrContig27057	+	135	494	1	360	GO:0000151(ubiquitin ligase complex);GO:0001664(G-protein coupled receptor binding);GO:0005524(ATP binding);GO:0005829(cytosol);GO:0006457(protein folding);GO:0007283(spermatogenesis);GO:0009408(response to heat);GO:0016020(membrane);GO:0030317(sperm motility);GO:0030521(androgen receptor signaling pathway);GO:0030544(Hsp70 protein binding);GO:0031397(negative regulation of protein ubiquitination…	04141(Protein processing in endoplasmic reticulum)	K09502	NA	DnaJ like protein subfamily A member 1 [Chelonia mydas]	7.81076	6.39709	8.88013	5.93987	0	10.6149	2.10477	0.0458663	0.779997	up	yes
MSTRG.15537	evm.TU.Contig272.19	chrContig272	-	458639	465844	6	1560	NA	NA	NA	NA	hypothetical viral protein [Triatoma infestans]	279.735	220.738	174.368	107.525	99.5838	109.072	1.04685	0.0290168	0.779997	up	yes
MSTRG.16705	evm.TU.Contig3.12	chrContig3	-	299288	352680	10	2734	NA	NA	K16779	NA	PREDICTED: guanine nucleotide exchange factor for Rab-3A [Tribolium castaneum]	8.28323	5.45497	17.4234	6.12101	3.98789	13.657	1.03487	0.0458833	0.779997	up	yes
MSTRG.17055	evm.TU.Contig30.215	chrContig30	+	5153519	5159235	5	1603	NA	NA	NA	NA	NA	10.9424	10.2586	6.47112	2.13912	4.36557	3.07137	1.05469	0.0400698	0.779997	up	yes
MSTRG.17339	evm.TU.Contig307.73	chrContig307	+	1738608	1747774	8	1828	GO:0004601(peroxidase activity);GO:0004602(glutathione peroxidase activity);GO:0006979(response to oxidative stress);GO:0016491(oxidoreductase activity);GO:0055114(oxidation-reduction process)	00480(Glutathione metabolism);00590(Arachidonic acid metabolism);04918(Thyroid hormone synthesis)	K00432	EC:1.11.1.9	phospholipid hydroperoxide glutathione peroxidase, putative [Pediculus humanus corporis]	14.3267	13.1287	15.8805	2.77735	3.63756	4.32241	1.84321	0.002478	0.587297	up	yes
MSTRG.17599	evm.TU.Contig31.134	chrContig31	+	2865091	2868462	4	851	NA	04140(Autophagy - animal);04142(Lysosome);04145(Phagosome);04210(Apoptosis);04612(Antigen processing and presentation);05205(Proteoglycans in cancer);05323(Rheumatoid arthritis);05418(Fluid shear stress and atherosclerosis)	K01365	EC:3.4.22.15	PREDICTED: crustapain-like [Nasonia vitripennis]	7.31738	9.21454	6.05818	2.22455	2.04578	3.13517	1.31959	0.0165747	0.779997	up	yes
MSTRG.17939	evm.TU.Contig31798.1	chrContig31798	-	1337	7385	6	1058	NA	03010(Ribosome)	K02902	NA	PREDICTED: 39S ribosomal protein L28, mitochondrial [Microplitis demolitor]	9.93086	3.97917	19.4481	8.15081	3.44051	17.8933	1.10572	0.0315487	0.779997	up	yes
MSTRG.18091	evm.TU.Contig32.94	chrContig32	-	1998918	2001247	2	1139	NA	00240(Pyrimidine metabolism)	K01937	EC:6.3.4.2	PREDICTED: transcription factor Adf-1-like [Linepithema humile]	1.10825	0.587696	2.7132	0.573555	0.017288	3.04251	1.05463	0.0391721	0.779997	up	yes
MSTRG.18139	evm.TU.Contig32.130	chrContig32	-	2358341	2367060	3	5754	NA	NA	NA	NA	PREDICTED: uncharacterized protein LOC100571961, partial [Acyrthosiphon pisum]	6.78638	5.21703	8.17981	6.13267	0.604922	6.48448	1.55662	0.0369062	0.779997	up	yes
MSTRG.18536	evm.TU.Contig327.5	chrContig327	-	46428	51605	3	1586	GO:0001228(transcriptional activator activity, RNA polymerase II transcription regulatory region sequence-specific binding);GO:0005634(nucleus);GO:0006357(regulation of transcription from RNA polymerase II promoter)	NA	K09037	NA	transcription factor mafG-like protein [Coptotermes formosanus]	14.1645	14.2853	19.7177	12.2723	4.97487	15.1429	1.12819	0.0140855	0.778996	up	yes
MSTRG.19602	evm.TU.Contig351.8	chrContig351	-	405342	408409	3	684	GO:0004867(serine-type endopeptidase inhibitor activity);GO:0010951(negative regulation of endopeptidase activity)	04151(PI3K-Akt signaling pathway);04510(Focal adhesion);04512(ECM-receptor interaction);04974(Protein digestion and absorption);05165(Human papillomavirus infection)	K06238	NA	putative secreted protease inhibitor [Ixodes scapularis]	3.14483	3.06331	1.99207	0.440764	0.868937	0.804352	1.02066	0.0199722	0.779997	up	yes
MSTRG.19704	evm.TU.Contig353.52	chrContig353	-	1080065	1171846	2	264	GO:0000381(regulation of alternative mRNA splicing, via spliceosome);GO:0003727(single-stranded RNA binding);GO:0003729(mRNA binding);GO:0003730(mRNA 3'-UTR binding);GO:0005634(nucleus);GO:0005737(cytoplasm);GO:0006417(regulation of translation);GO:0007155(cell adhesion);GO:0007284(spermatogonial cell division);GO:0007438(oenocyte development);GO:0007475(apposition of dorsal and ventral imaginal …	NA	K14945	NA	PREDICTED: protein held out wings isoform X2 [Acyrthosiphon pisum]	3.3173	0.739673	5.5771	0.068082	0.037018	0.704727	2.082	0.0324398	0.779997	up	yes
MSTRG.19977	evm.TU.Contig36.4	chrContig36	+	75060	129380	8	1044	GO:0004674(protein serine/threonine kinase activity);GO:0004691(cAMP-dependent protein kinase activity);GO:0005515(protein binding);GO:0005524(ATP binding);GO:0005952(cAMP-dependent protein kinase complex);GO:0006468(protein phosphorylation);GO:0007476(imaginal disc-derived wing morphogenesis)	NA	K19584	EC:2.7.11.11	PREDICTED: protein kinase DC2 [Tribolium castaneum]	7.72117	10.1567	17.587	8.7033	0	14.9324	2.47463	0.0470815	0.779997	up	yes
MSTRG.20084	evm.TU.Contig36.96	chrContig36	-	1904581	1930829	26	5027	GO:0005929(cilium);GO:0030991(intraciliary transport particle A);GO:0035721(intraciliary retrograde transport);GO:0042384(cilium assembly)	NA	K19671	NA	WD repeat-containing protein 19 [Zootermopsis nevadensis]	3.48557	2.8665	3.95032	1.51485	0.603836	2.66829	1.2406	0.00232117	0.585485	up	yes
MSTRG.20401	evm.TU.Contig371.1	chrContig371	+	1347	14715	10	3328	NA	NA	K18422	EC:3.6.4.13	Putative helicase mov-10-A [Zootermopsis nevadensis]	18.2351	15.4233	18.923	6.03734	7.24624	11.4917	1.22748	0.0196981	0.779997	up	yes
MSTRG.20722	evm.TU.Contig377.41	chrContig377	-	824114	845340	20	4069	NA	03018(RNA degradation)	K12600	NA	Tetratricopeptide repeat protein 37 [Zootermopsis nevadensis]	11.1457	8.89802	10.5649	0.073016	0.017508	0.386272	3.43751	9.06753e-05	0.303466	up	yes
MSTRG.20843	evm.TU.Contig38.31	chrContig38	-	363161	389143	10	3411	NA	04970(Salivary secretion);04971(Gastric acid secretion);04972(Pancreatic secretion);04976(Bile secretion)	K13855	NA	conserved hypothetical protein [Riptortus pedestris]	5.06567	4.04051	4.75816	3.2399	0.793988	4.31682	1.19984	0.0251472	0.779997	up	yes
MSTRG.20957	evm.TU.Contig384.10	chrContig384	-	251667	256470	2	1099	NA	NA	NA	NA	NA	501.789	484.803	409.524	182.559	212.349	260.507	1.12091	0.0162468	0.779997	up	yes
MSTRG.22139	evm.TU.Contig42.28	chrContig42	-	678956	699566	2	1500	GO:0005741(mitochondrial outer membrane);GO:0007283(spermatogenesis);GO:0009922(fatty acid elongase activity);GO:0016021(integral component of membrane);GO:0030176(integral component of endoplasmic reticulum membrane);GO:0030497(fatty acid elongation);GO:0042759(long-chain fatty acid biosynthetic process)	00062(Fatty acid elongation);01040(Biosynthesis of unsaturated fatty acids)	K10203	EC:2.3.1.199	AAEL013128-PA [Aedes aegypti]	68.6597	15.158	47.5088	35.419	0.687067	55.9478	3.1078	0.0435922	0.779997	up	yes
MSTRG.22246	evm.TU.Contig42.121	chrContig42	-	2701068	2739655	8	1585	GO:0004672(protein kinase activity);GO:0004674(protein serine/threonine kinase activity);GO:0004712(protein serine/threonine/tyrosine kinase activity);GO:0005524(ATP binding);GO:0006468(protein phosphorylation);GO:0007399(nervous system development);GO:0007420(brain development);GO:0007611(learning or memory);GO:0007623(circadian rhythm);GO:0007632(visual behavior);GO:0008355(olfactory learning);…	NA	K08825	EC:2.7.12.1	PREDICTED: serine/threonine-protein kinase minibrain isoform X5 [Bactrocera cucurbitae]	1.85906	3.01659	2.53269	0	0.411401	0.771786	1.36293	0.0346775	0.779997	up	yes
evm.TU.Contig4375.1	evm.TU.Contig4375.1	chrContig4375	+	132	504	2	207	GO:0001954(positive regulation of cell-matrix adhesion);GO:0003779(actin binding);GO:0005178(integrin binding);GO:0005654(nucleoplasm);GO:0005737(cytoplasm);GO:0005886(plasma membrane);GO:0007528(neuromuscular junction development);GO:0008270(zinc ion binding);GO:0016010(dystrophin-associated glycoprotein complex);GO:0017166(vinculin binding);GO:0019901(protein kinase binding);GO:0030175(filopodi…	05410(Hypertrophic cardiomyopathy (HCM));05412(Arrhythmogenic right ventricular cardiomyopathy (ARVC));05414(Dilated cardiomyopathy (DCM));05416(Viral myocarditis)	K10366	NA	PREDICTED: LOW QUALITY PROTEIN: utrophin-like [Diaphorina citri]	2.74197	2.04908	1.77364	1.02767	0.312495	0.924206	1.02698	0.0283877	0.779997	up	yes
MSTRG.22701	evm.TU.Contig44.18	chrContig44	+	598765	608121	3	533	GO:0003674(molecular_function);GO:0005575(cellular_component);GO:0008150(biological_process)	NA	NA	NA	PREDICTED: uncharacterized protein LOC100161816 [Acyrthosiphon pisum]	14.469	12.2934	15.3269	13.119	3.07543	15.6274	1.25717	0.0499483	0.779997	up	yes
MSTRG.23224	evm.TU.Contig45.148	chrContig45	-	4288523	4301263	6	5261	GO:0005094(Rho GDP-dissociation inhibitor activity);GO:0005737(cytoplasm)	04722(Neurotrophin signaling pathway);04962(Vasopressin-regulated water reabsorption)	K12462	NA	Rho GDP dissociation inhibitor [Schistocerca gregaria]	21.0088	20.4334	19.3483	14.9406	6.1124	15.8895	1.13686	0.0415704	0.779997	up	yes
MSTRG.23909	evm.TU.Contig47.9	chrContig47	+	303909	383894	9	1408	GO:0001952(regulation of cell-matrix adhesion);GO:0015629(actin cytoskeleton);GO:0051371(muscle alpha-actinin binding)	NA	K19867	NA	PREDICTED: PDZ and LIM domain protein Zasp isoform X8 [Orussus abietinus]	2.94076	1.37361	2.86199	0.01896	0.323812	1.08162	1.49733	0.0338851	0.779997	up	yes
MSTRG.24103	evm.TU.Contig479.25	chrContig479	-	614837	646713	6	1362	GO:0003841(1-acylglycerol-3-phosphate O-acyltransferase activity)	00561(Glycerolipid metabolism);00564(Glycerophospholipid metabolism);04072(Phospholipase D signaling pathway);04975(Fat digestion and absorption)	K13509	EC:2.3.1.51	1-acyl-sn-glycerol-3-phosphate acyltransferase alpha [Zootermopsis nevadensis]	71.933	67.5297	57.6205	21.5202	26.3305	32.1014	1.30157	0.0131385	0.768459	up	yes
MSTRG.24829	evm.TU.Contig498.29	chrContig498	+	540932	555695	5	2107	NA	NA	NA	NA	conserved hypothetical protein [Culex quinquefasciatus]	12.7265	10.0682	11.0513	3.71148	5.37214	3.57597	1.12603	0.00960399	0.741915	up	yes
MSTRG.24859	evm.TU.Contig499.11	chrContig499	+	186111	215275	17	2764	NA	00514(Other types of O-glycan biosynthesis);04931(Insulin resistance)	K09667	EC:2.4.1.255	Tetratricopeptide repeat protein 7B [Zootermopsis nevadensis]	1.31612	1.16704	7.18921	0.972584	0	3.77695	1.6451	0.0446929	0.779997	up	yes
MSTRG.26031	evm.TU.Contig562.6	chrContig562	-	108728	112463	2	2681	NA	NA	K17623	EC:3.1.3.-	hypothetical protein EAI_10907 [Harpegnathos saltator]	52.1124	29.869	63.9959	27.9952	20.5968	38.2872	1.12898	0.0134044	0.773157	up	yes
MSTRG.26358	evm.TU.Contig58.115	chrContig58	+	1977517	1984259	5	1799	NA	NA	NA	NA	PREDICTED: uncharacterized protein LOC105398407 [Plutella xylostella]	3.80207	1.19863	2.78545	0.291137	0.379492	0.293155	1.48382	0.0398769	0.779997	up	yes
MSTRG.26847	evm.TU.Contig61.36	chrContig61	+	1140573	1142915	3	531	NA	NA	NA	NA	NA	24.3719	17.8269	41.6839	11.6846	8.50058	10.7003	1.58036	0.019347	0.779997	up	yes
MSTRG.26933	evm.TU.Contig614.16	chrContig614	+	422844	424397	1	1554	NA	NA	NA	NA	NA	9.86782	2.07974	7.13964	4.97328	0	5.23561	2.0017	0.047965	0.779997	up	yes
MSTRG.27421	evm.TU.Contig64.99	chrContig64	+	2372887	2395209	14	3824	NA	NA	K14388	NA	PREDICTED: sodium-coupled monocarboxylate transporter 1 [Apis florea]	4.84528	3.57079	3.66513	0.897919	1.56457	2.11546	1.07041	0.0400884	0.779997	up	yes
MSTRG.27562	evm.TU.Contig649.23	chrContig649	+	613995	679458	16	5298	GO:0002064(epithelial cell development);GO:0022404(molting cycle process);GO:0042335(cuticle development)	00230(Purine metabolism)	K01487	EC:3.5.4.3	PREDICTED: uncharacterized protein LOC103510819 [Diaphorina citri]	6.35391	6.61895	11.6869	2.69642	2.89465	5.72016	1.2752	0.0317898	0.779997	up	yes
MSTRG.27572	evm.TU.Contig649.32	chrContig649	+	946565	953070	2	1447	GO:0004376(glycolipid mannosyltransferase activity);GO:0005634(nucleus)	00510(N-Glycan biosynthesis);00513(Various types of N-glycan biosynthesis)	K03843	EC:2.4.1.132 2.4.1.257	Alpha-1,3-mannosyltransferase ALG2 [Zootermopsis nevadensis]	15.8805	16.0038	16.2031	6.90298	7.01975	13.7264	1.02439	0.0400551	0.779997	up	yes
MSTRG.27656	evm.TU.Contig649.85	chrContig649	-	1986296	1987454	1	1159	NA	04111(Cell cycle - yeast);04113(Meiosis - yeast);04218(Cellular senescence)	K02830	EC:3.1.11.2	PREDICTED: cell cycle checkpoint protein RAD1-like [Acyrthosiphon pisum]	10.2765	10.2127	8.53392	0	0	5.37464	3.15803	0.0422022	0.779997	up	yes
MSTRG.27810	evm.TU.Contig65.108	chrContig65	+	3064834	3070572	5	1526	NA	04530(Tight junction);05100(Bacterial invasion of epithelial cells);05130(Pathogenic Escherichia coli infection);05131(Shigellosis);05205(Proteoglycans in cancer)	K06106	NA	PREDICTED: src substrate cortactin [Diaphorina citri]	3.40728	1.68333	6.13784	1.38598	0.948787	2.3365	1.26492	0.0305848	0.779997	up	yes
MSTRG.28535	evm.TU.Contig692.20	chrContig692	+	451171	460501	9	1514	GO:0003857(3-hydroxyacyl-CoA dehydrogenase activity);GO:0006631(fatty acid metabolic process);GO:0016491(oxidoreductase activity);GO:0055114(oxidation-reduction process);GO:0070403(NAD+ binding)	00062(Fatty acid elongation);00071(Fatty acid degradation);00280(Valine, leucine and isoleucine degradation);00281(Geraniol degradation);00310(Lysine degradation);00380(Tryptophan metabolism);00650(Butanoate metabolism);00930(Caprolactam degradation)	K00022	EC:1.1.1.35	L-3-hydroxyacyl-Coenzyme A dehydrogenase [Acyrthosiphon pisum]	40.6389	42.8981	43.3714	15.987	14.9261	37.3445	1.31591	0.0423241	0.779997	up	yes
MSTRG.28653	evm.TU.Contig70.30	chrContig70	+	370757	375884	4	1417	NA	04137(Mitophagy - animal);04139(Mitophagy - yeast)	K17969	NA	AAEL008671-PA [Aedes aegypti]	37.9501	24.5417	32.3268	22.2138	10.2094	24.6339	1.19435	0.0170221	0.779997	up	yes
MSTRG.28887	evm.TU.Contig71.75	chrContig71	-	1144395	1145133	1	739	GO:0005744(mitochondrial inner membrane presequence translocase complex);GO:0030150(protein import into mitochondrial matrix)	NA	K17805	NA	mitochondria associated granulocyte macrophage csf signaling molecule [Papilio xuthus]	7.14807	7.53597	8.34867	0	0	5.80646	2.91311	0.0472246	0.779997	up	yes
MSTRG.29019	evm.TU.Contig720.8	chrContig720	-	212508	215734	4	997	NA	04142(Lysosome)	K13443	NA	PREDICTED: protein NPC2 homolog [Musca domestica]	264.539	286.692	209.954	73.7903	110.52	115.186	1.26308	0.0257488	0.779997	up	yes
MSTRG.29175	evm.TU.Contig731.22	chrContig731	-	310275	311106	2	634	GO:0001056(RNA polymerase III activity);GO:0005666(DNA-directed RNA polymerase III complex);GO:0006386(termination of RNA polymerase III transcription)	00230(Purine metabolism);00240(Pyrimidine metabolism);03020(RNA polymerase);04623(Cytosolic DNA-sensing pathway);05169(Epstein-Barr virus infection)	K03019	NA	PREDICTED: DNA-directed RNA polymerase III subunit RPC10-like isoform X2 [Bombus impatiens]	10.4701	6.55227	12.2467	10.0971	1.87937	10.892	1.28551	0.0312468	0.779997	up	yes
MSTRG.29198	evm.TU.Contig731.46	chrContig731	+	813408	822494	9	2028	NA	04071(Sphingolipid signaling pathway);04140(Autophagy - animal);04142(Lysosome);04210(Apoptosis);05152(Tuberculosis)	K01379	EC:3.4.23.5	Lysosomal aspartic protease [Zootermopsis nevadensis]	198.001	176.471	176.811	79.8662	91.3796	109.669	1.03333	0.00986752	0.741915	up	yes
MSTRG.29630	evm.TU.Contig767.10	chrContig767	+	128866	138476	8	1427	GO:0012505(endomembrane system);GO:0016477(cell migration);GO:0035010(encapsulation of foreign target)	00510(N-Glycan biosynthesis);00513(Various types of N-glycan biosynthesis);04141(Protein processing in endoplasmic reticulum)	K12669	NA	conserved hypothetical protein [Riptortus pedestris]	76.7113	72.5004	74.7283	51.4976	29.8945	61.3504	1.00112	0.0156053	0.779997	up	yes
MSTRG.30191	evm.TU.Contig79.4	chrContig79	-	66758	78751	10	4982	NA	NA	K16608	EC:6.3.2.-	PREDICTED: tubulin glycylase 3A-like [Diaphorina citri]	0.674927	1.04221	1.63814	0	0	0.569039	1.06388	0.0322333	0.779997	up	yes
MSTRG.30430	evm.TU.Contig794.6	chrContig794	-	185207	187740	2	708	NA	NA	NA	NA	PREDICTED: uncharacterized protein LOC105690442 [Athalia rosae]	2.03122	2.47291	4.02201	0.37693	0.381995	1.36378	1.46648	0.0173655	0.779997	up	yes
MSTRG.30660	evm.TU.Contig8.106	chrContig8	+	1744002	1754732	8	961	NA	NA	K16506	NA	hypothetical protein PRIPAC_4570, partial [Pristionchus pacificus]	2.63723	1.08928	7.05699	2.421	0	3.79201	1.6227	0.00756985	0.734888	up	yes
MSTRG.30741	evm.TU.Contig8.177	chrContig8	+	2898401	2907052	8	1700	GO:0005829(cytosol);GO:0030140(trans-Golgi network transport vesicle);GO:0042609(CD4 receptor binding)	04144(Endocytosis)	K19367	NA	Maspardin [Zootermopsis nevadensis]	41.333	42.0184	43.7892	16.3395	23.9542	14.1364	1.01362	0.0093752	0.741915	up	yes
MSTRG.30888	evm.TU.Contig8.314	chrContig8	-	5616977	5621905	4	735	NA	00062(Fatty acid elongation);00071(Fatty acid degradation);00280(Valine, leucine and isoleucine degradation)	K07508	EC:2.3.1.16	PREDICTED: uncharacterized protein C1orf43 homolog [Athalia rosae]	15.4505	6.66426	12.1251	3.12252	2.8951	3.20675	1.70866	0.0217757	0.779997	up	yes
MSTRG.31112	evm.TU.Contig806.1	chrContig806	+	10785	14179	3	1018	NA	NA	NA	NA	NA	27.8994	15.4996	38.8504	12.1818	11.119	26.7071	1.22576	0.0390831	0.779997	up	yes
MSTRG.31284	evm.TU.Contig836.9	chrContig836	+	294962	317900	4	1778	NA	NA	NA	NA	unkown protein [Riptortus pedestris]	165.421	61.6176	227.448	37.0461	33.4504	57.3116	2.17402	0.0266072	0.779997	up	yes
MSTRG.31972	evm.TU.Contig8762.1	chrContig8762	-	434	2864	3	456	GO:0003674(molecular_function);GO:0005575(cellular_component);GO:0008150(biological_process)	04141(Protein processing in endoplasmic reticulum);04145(Phagosome);04612(Antigen processing and presentation);05142(Chagas disease (American trypanosomiasis));05166(HTLV-I infection)	K08057	NA	calreticulin [Riptortus pedestris]	14.5943	1.8208	35.541	13.3848	0.640066	20.382	2.28327	0.0322692	0.779997	up	yes
MSTRG.32323	evm.TU.Contig90.51	chrContig90	-	1170081	1179565	7	1777	NA	04120(Ubiquitin mediated proteolysis)	K10260	NA	F-box/WD repeat-containing protein 7 [Zootermopsis nevadensis]	2.41363	2.61696	4.40638	0.533446	0.031562	2.05998	1.78197	0.00792083	0.734888	up	yes
MSTRG.420	evm.TU.Contig0.304	chrContig0	-	6070302	6083053	10	1482	GO:0030170(pyridoxal phosphate binding);GO:0042802(identical protein binding)	00564(Glycerophospholipid metabolism)	K14286	EC:4.2.3.2	PREDICTED: alanine--glyoxylate aminotransferase 2-like [Megachile rotundata]	118.784	217.08	105.205	217.58	301.663	122.236	-1.04889	0.01915	0.779997	down	yes
MSTRG.446	evm.TU.Contig0.319	chrContig0	-	6579394	6583782	2	518	NA	NA	NA	NA	NA	5.50784	1.75632	5.51138	28.7949	22.917	53.7919	-2.26063	0.00891945	0.738757	down	yes
MSTRG.893	evm.TU.Contig1.96	chrContig1	-	2618758	2620140	1	1383	NA	NA	K11800	NA	hypothetical protein L798_01471 [Zootermopsis nevadensis]	0	0	0	0.777903	3.4079	0	-1.59663	0.0336297	0.779997	down	yes
MSTRG.1332	evm.TU.Contig101.35	chrContig101	-	964052	969685	2	1933	NA	NA	NA	NA	PREDICTED: uncharacterized protein LOC103315171 [Tribolium castaneum]	0.588084	0.130123	0.07776	1.99714	5.34308	4.72381	-2.0363	0.0258569	0.779997	down	yes
MSTRG.2716	evm.TU.Contig112.80	chrContig112	-	1641700	1652980	9	1335	GO:0003746(translation elongation factor activity);GO:0006412(translation);GO:0006414(translational elongation)	05134(Legionellosis)	K03233	NA	elongation factor 1-gamma [Nilaparvata lugens]	22.2072	26.4368	19.2722	56.5162	55.6365	25.8095	-1.26536	0.0273007	0.779997	down	yes
MSTRG.4372	evm.TU.Contig13.27	chrContig13	+	690322	702860	12	2938	NA	NA	K15014	NA	Equilibrative nucleoside transporter 3 [Zootermopsis nevadensis]	0.003715	0.860783	0.022336	1.22586	4.11689	1.83722	-1.78634	0.0154636	0.779997	down	yes
MSTRG.4750	evm.TU.Contig13.245_evm.TU.Contig13.246	chrContig13	+	4462788	4495965	11	2365	NA	00564(Glycerophospholipid metabolism);00565(Ether lipid metabolism)	K13510	EC:2.3.1.23 2.3.1.67	PREDICTED: 1-acylglycerophosphocholine O-acyltransferase 1 isoform X2 [Tribolium castaneum]	0.146454	0.401451	0	1.55042	1.11641	1.17839	-1.01622	0.0162011	0.779997	down	yes
MSTRG.4853	evm.TU.Contig13.324	chrContig13	+	6628392	6633603	7	1077	NA	NA	K19404	EC:3.1.1.-	Pancreatic triacylglycerol lipase [Camponotus floridanus]	0	4.61848	0	5.44024	53.5733	0	-4.03598	0.00805557	0.737993	down	yes
MSTRG.5268	evm.TU.Contig13615.1	chrContig13615	-	111	4155	4	594	NA	00511(Other glycan degradation);00600(Sphingolipid metabolism);04142(Lysosome)	K01201	EC:3.2.1.45	hypothetical protein OESDEN_20781 [Oesophagostomum dentatum]	2.80087	6.94366	0.781481	5.18597	10.4222	1.57461	-1.53938	0.0240149	0.779997	down	yes
MSTRG.5699	evm.TU.Contig13924.1	chrContig13924	+	177	757	2	300	GO:0008142(oxysterol binding)	NA	NA	NA	GA13517, isoform C [Drosophila pseudoobscura pseudoobscura]	2.30163	2.61186	1.12201	2.58737	7.24522	1.8399	-1.15362	0.00702988	0.734888	down	yes
MSTRG.5774	evm.TU.Contig14.37	chrContig14	-	549510	561931	12	1344	NA	NA	NA	NA	Cytosolic carboxypeptidase 2 [Zootermopsis nevadensis]	0.220865	1.59145	0	0.420269	2.97152	0.210191	-1.11422	0.0211231	0.779997	down	yes
MSTRG.6290	evm.TU.Contig143.64	chrContig143	+	1121340	1146341	4	1872	GO:0030246(carbohydrate binding)	NA	NA	NA	PREDICTED: uncharacterized protein LOC105452202 [Wasmannia auropunctata]	3.91343	10.5883	7.92179	24.9195	36.0072	11.1565	-2.01236	0.0325869	0.779997	down	yes
MSTRG.6392	evm.TU.Contig144.28	chrContig144	-	486036	489319	2	396	NA	NA	NA	NA	NA	0	0	0	1.35445	3.5392	0	-1.73837	0.0332208	0.779997	down	yes
MSTRG.6822	evm.TU.Contig1547.3	chrContig1547	+	6365	7456	1	1092	NA	NA	NA	NA	argonaute-3 [Nilaparvata lugens]	0	0	0	1.5531	1.09389	0.954427	-1.13922	0.0050135	0.712259	down	yes
MSTRG.7061	evm.TU.Contig157.83	chrContig157	+	1892841	1894480	1	1640	NA	NA	NA	NA	PREDICTED: uncharacterized protein LOC105667487 isoform X2 [Linepithema humile]	0	0	0	0.453401	1.79929	0	-1.09756	0.0347255	0.779997	down	yes
MSTRG.7175	evm.TU.Contig158.30	chrContig158	-	626828	659668	9	1397	NA	00062(Fatty acid elongation)	K10249	EC:2.3.1.199	PREDICTED: elongation of very long chain fatty acids protein 4-like [Acyrthosiphon pisum]	0	0	2.37229	7.14367	4.78346	13.7862	-1.9069	0.0386874	0.779997	down	yes
MSTRG.7239	evm.TU.Contig159.17	chrContig159	-	264795	302461	5	3630	GO:0042981(regulation of apoptotic process)	04210(Apoptosis)	K02310	NA	Cell death activator CIDE-3, partial [Zootermopsis nevadensis]	0.071655	0.058073	0.007369	1.11543	1.30081	1.50099	-1.12506	0.00143153	0.536951	down	yes
MSTRG.7597	evm.TU.Contig165.32	chrContig165	-	1110124	1119912	3	1362	GO:0003755(peptidyl-prolyl cis-trans isomerase activity)	04020(Calcium signaling pathway);04022(cGMP - PKG signaling pathway);05012(Parkinson's disease);05016(Huntington's disease);05145(Toxoplasmosis)	K09565	EC:5.2.1.8	hypothetical protein YQE_02717, partial [Dendroctonus ponderosae]	283.92	478.737	382.141	670.548	816.349	389.273	-1.0217	0.0491176	0.779997	down	yes
MSTRG.7623	evm.TU.Contig165.52	chrContig165	-	1526249	1527067	2	261	GO:0001836(release of cytochrome c from mitochondria);GO:0003839(gamma-glutamylcyclotransferase activity);GO:0005829(cytosol);GO:0006750(glutathione biosynthetic process);GO:0042803(protein homodimerization activity);GO:0070062(extracellular exosome)	00480(Glutathione metabolism)	K00682	EC:2.3.2.4	Gamma-glutamylcyclotransferase [Zootermopsis nevadensis]	0	0.301717	0	7.02581	1.57511	8.28052	-1.91771	0.0416828	0.779997	down	yes
MSTRG.7725	evm.TU.Contig166.33	chrContig166	+	960401	962727	2	890	NA	NA	NA	NA	NA	0.537578	0.307685	1.02116	3.07245	2.92252	6.84039	-1.28747	0.0157115	0.779997	down	yes
MSTRG.7848	evm.TU.Contig167.31	chrContig167	-	665299	674007	5	5066	NA	NA	NA	NA	NA	0.367339	0	0.453507	2.33256	3.96019	2.96288	-1.69824	0.0122144	0.759734	down	yes
MSTRG.7864	evm.TU.Contig167.48	chrContig167	-	948295	985088	21	3585	GO:0000059(protein import into nucleus, docking);GO:0000060(protein import into nucleus, translocation);GO:0005737(cytoplasm);GO:0006607(NLS-bearing protein import into nucleus);GO:0006610(ribosomal protein import into nucleus);GO:0008139(nuclear localization sequence binding);GO:0008565(protein transporter activity);GO:0031965(nuclear membrane);GO:0034399(nuclear periphery)	NA	K18752	NA	Importin-5 [Zootermopsis nevadensis]	1.41531	1.92123	1.06346	3.52938	3.6814	4.97026	-1.03906	0.0266469	0.779997	down	yes
MSTRG.8303	evm.TU.Contig17.125	chrContig17	-	2912577	2922443	7	1590	NA	00040(Pentose and glucuronate interconversions);00053(Ascorbate and aldarate metabolism);00140(Steroid hormone biosynthesis);00830(Retinol metabolism);00860(Porphyrin and chlorophyll metabolism);00980(Metabolism of xenobiotics by cytochrome P450);00982(Drug metabolism - cytochrome P450);00983(Drug metabolism - other enzymes);05204(Chemical carcinogenesis)	K00699	EC:2.4.1.17	UDP-glucuronosyltransferase 2B5 [Zootermopsis nevadensis]	12.0507	24.2088	18.8359	33.4524	56.5542	27.9137	-1.39903	0.0278735	0.779997	down	yes
MSTRG.8461	evm.TU.Contig170.6	chrContig170	-	141556	160385	10	1811	GO:0006839(mitochondrial transport);GO:0016021(integral component of membrane);GO:0031966(mitochondrial membrane)	NA	K15103	NA	PREDICTED: mitochondrial uncoupling protein 2 [Ochotona princeps]	1.18004	0.010793	1.03574	66.8459	35.5665	7.0428	-4.37034	0.0390781	0.779997	down	yes
MSTRG.8716	evm.TU.Contig172.91	chrContig172	+	1903904	1906792	1	2889	NA	NA	NA	NA	hypothetical protein L798_03850 [Zootermopsis nevadensis]	0	0	0	1.69637	3.48071	0	-1.78189	0.0373752	0.779997	down	yes
MSTRG.9217	evm.TU.Contig18.21	chrContig18	+	336818	348061	14	2215	NA	NA	K16533	NA	PREDICTED: centrosomal protein of 290 kDa-like [Tribolium castaneum]	2.26444	2.28437	1.04705	5.43784	4.7904	2.30534	-1.13914	0.0445592	0.779997	down	yes
MSTRG.9598	evm.TU.Contig1802.1	chrContig1802	-	833	3507	3	450	GO:0005887(integral component of plasma membrane);GO:0042675(compound eye cone cell differentiation);GO:0046533(negative regulation of photoreceptor cell differentiation);GO:0050931(pigment cell differentiation);GO:0098595(perivitelline space)	NA	K16353	NA	PREDICTED: LOW QUALITY PROTEIN: protein sidekick [Bombyx mori]	1.53163	4.41553	0	6.23384	15.0145	2.28475	-2.64572	0.00636948	0.722279	down	yes
MSTRG.10222	evm.TU.Contig1928.1	chrContig1928	+	15694	31525	9	2204	NA	00052(Galactose metabolism);00500(Starch and sucrose metabolism)	K01187	EC:3.2.1.20	sucrase [Nilaparvata lugens]	698.675	995.317	628.351	1899.14	2682.74	1051.14	-1.68463	0.00238835	0.585485	down	yes
MSTRG.10955	evm.TU.Contig20.116	chrContig20	-	2912100	2917724	6	942	NA	04142(Lysosome)	K12384	NA	PREDICTED: sensory neuron membrane protein 2 [Fopius arisanus]	1.31084	1.0335	0.32386	3.87048	2.65447	3.78803	-1.23988	0.0434957	0.779997	down	yes
MSTRG.11194	evm.TU.Contig20137.1	chrContig20137	-	46	491	1	446	NA	NA	K08145	NA	sugar transporter [Nilaparvata lugens]	3.19061	8.15739	1.80957	6.37411	24.0959	1.92742	-1.94012	0.000756717	0.522382	down	yes
MSTRG.11352	evm.TU.Contig203.1	chrContig203	-	5821	17223	8	1982	NA	NA	K08145	NA	sugar transporter [Nilaparvata lugens]	0	0	0	2.23067	2.77914	1.29272	-1.7959	0.00181331	0.556504	down	yes
MSTRG.11609	evm.TU.Contig21.25	chrContig21	+	454749	481125	19	10738	NA	04151(PI3K-Akt signaling pathway);04510(Focal adhesion);04512(ECM-receptor interaction);04610(Complement and coagulation cascades);04611(Platelet activation);05165(Human papillomavirus infection)	K03900	NA	PREDICTED: hemocytin [Acyrthosiphon pisum]	0.326438	0.154592	0.472391	16.8925	3.13883	9.66938	-2.30682	0.0285579	0.779997	down	yes
MSTRG.11619	evm.TU.Contig21.49	chrContig21	+	1019244	1036621	8	2547	NA	NA	NA	NA	PREDICTED: uncharacterized protein LOC100645476 isoform X1 [Bombus terrestris]	1.57712	2.02752	0.622708	3.94741	3.78267	2.51126	-1.16562	0.0255933	0.779997	down	yes
MSTRG.11904	evm.TU.Contig213.25	chrContig213	+	501497	504153	1	2657	GO:0003870(5-aminolevulinate synthase activity);GO:0005739(mitochondrion);GO:0005759(mitochondrial matrix);GO:0006783(heme biosynthetic process);GO:0030170(pyridoxal phosphate binding);GO:0040003(chitin-based cuticle development)	00260(Glycine, serine and threonine metabolism);00860(Porphyrin and chlorophyll metabolism)	K00643	EC:2.3.1.37	5-aminolevulinate synthase, erythroid-specific, mitochondrial [Zootermopsis nevadensis]	0.000331	7.33345	0	11.9459	25.3418	0	-3.56224	0.0451618	0.779997	down	yes
MSTRG.12008	evm.TU.Contig215.4	chrContig215	+	85628	119838	14	3528	NA	NA	NA	NA	hypothetical protein L798_13972 [Zootermopsis nevadensis]	0.79694	4.89972	0.408929	1.32289	9.69646	0.11814	-1.58913	0.0100374	0.741915	down	yes
MSTRG.12743	evm.TU.Contig224.198	chrContig224	+	3247203	3304662	12	3865	GO:0000122(negative regulation of transcription from RNA polymerase II promoter);GO:0003714(transcription corepressor activity);GO:0005634(nucleus);GO:0042803(protein homodimerization activity)	04310(Wnt signaling pathway);04330(Notch signaling pathway);05200(Pathways in cancer);05220(Chronic myeloid leukemia)	K04496	NA	C-terminal-binding protein [Zootermopsis nevadensis]	0.755473	0.29306	0	2.57917	2.30554	1.32617	-1.37944	0.0276146	0.779997	down	yes
MSTRG.13787	evm.TU.Contig248.55	chrContig248	+	1354869	1391566	16	3055	GO:0006897(endocytosis);GO:0006914(autophagy);GO:0007269(neurotransmitter secretion);GO:0008593(regulation of Notch signaling pathway);GO:0009997(negative regulation of cardioblast cell fate specification);GO:0015032(storage protein import into fat body);GO:0045747(positive regulation of Notch signaling pathway);GO:0048488(synaptic vesicle endocytosis)	04144(Endocytosis)	K12471	NA	Epsin-2 [Zootermopsis nevadensis]	1.47653	1.67408	1.83428	6.06364	5.86571	4.59363	-1.34428	0.00257254	0.590127	down	yes
MSTRG.13859	evm.TU.Contig25.15	chrContig25	+	320708	359113	11	2824	GO:0003333(amino acid transmembrane transport);GO:0015171(amino acid transmembrane transporter activity)	04138(Autophagy - yeast)	K14209	NA	Proton-coupled amino acid transporter 1 [Zootermopsis nevadensis]	495.607	629.825	471.008	827.307	1212.23	848.394	-1.07291	0.00259306	0.591353	down	yes
MSTRG.14379	evm.TU.Contig253.72	chrContig253	-	1620501	1647983	5	910	NA	04214(Apoptosis - fly);04657(IL-17 signaling pathway);05200(Pathways in cancer);05222(Small cell lung cancer)	K09848	NA	PREDICTED: TNF receptor-associated factor 4 isoform X1 [Apis florea]	0.148239	0.456334	0	0.225115	4.54944	0.18825	-1.52126	0.0423491	0.779997	down	yes
MSTRG.14679	evm.TU.Contig25883.1	chrContig25883	-	3101	7999	4	264	NA	00230(Purine metabolism);05340(Primary immunodeficiency)	K01488	EC:3.5.4.4	Adenosine deaminase [Caligus clemensi]	1.51024	4.22601	0.765009	3.13008	6.91384	2.12599	-1.36784	0.0142753	0.778996	down	yes
MSTRG.15124	evm.TU.Contig26244.2	chrContig26244	-	12540	19790	7	2046	GO:0004616(phosphogluconate dehydrogenase (decarboxylating) activity);GO:0006574(valine catabolic process);GO:0008442(3-hydroxyisobutyrate dehydrogenase activity);GO:0009083(branched-chain amino acid catabolic process);GO:0016491(oxidoreductase activity);GO:0051287(NAD binding);GO:0055114(oxidation-reduction process)	00280(Valine, leucine and isoleucine degradation)	K00020	EC:1.1.1.31	PREDICTED: 3-hydroxyisobutyrate dehydrogenase, mitochondrial-like isoform X2 [Cerapachys biroi]	6.73449	13.6226	7.58843	16.7575	22.3565	10.9137	-1.1828	0.0186728	0.779997	down	yes
MSTRG.15180	evm.TU.Contig264.3	chrContig264	-	97295	123895	9	2134	NA	NA	K08145	NA	sugar transporter 11 [Nilaparvata lugens]	44.5542	54.0348	26.3835	75.9889	97.0839	31.895	-1.20307	0.0306102	0.779997	down	yes
MSTRG.15359	evm.TU.Contig266.53	chrContig266	-	984017	1021636	12	1662	GO:0005887(integral component of plasma membrane);GO:0015179(L-amino acid transmembrane transporter activity);GO:0015297(antiporter activity)	04974(Protein digestion and absorption)	K13868	NA	B(0,+)-type amino acid transporter 1 [Zootermopsis nevadensis]	0	0.189373	0.033018	1.21663	2.13648	0.804546	-1.3799	0.00108491	0.53304	down	yes
MSTRG.15472	evm.TU.Contig27045.1	chrContig27045	-	18	2303	3	891	NA	NA	K18417	EC:3.1.-.-	PREDICTED: monocarboxylate transporter 12-B [Athalia rosae]	0	2.48181	1.41789	131.407	119.643	5.35536	-5.68961	0.0328734	0.779997	down	yes
MSTRG.15884	evm.TU.Contig28084.1	chrContig28084	+	1966	2717	2	194	GO:0005096(GTPase activator activity);GO:0005886(plasma membrane);GO:0008593(regulation of Notch signaling pathway);GO:0017137(Rab GTPase binding);GO:0017157(regulation of exocytosis);GO:0019905(syntaxin binding);GO:0022008(neurogenesis);GO:0030864(cortical actin cytoskeleton);GO:0030866(cortical actin cytoskeleton organization);GO:0032878(regulation of establishment or maintenance of cell polari…	04390(Hippo signaling pathway);04391(Hippo signaling pathway -fly);04530(Tight junction);05165(Human papillomavirus infection)	K06094	NA	hypothetical protein L798_14850, partial [Zootermopsis nevadensis]	0.070164	1.11579	0.046177	0.169582	2.99581	0	-1.09747	0.0359137	0.779997	down	yes
MSTRG.16348	evm.TU.Contig292.2	chrContig292	-	40652	54500	8	1332	GO:0004586(ornithine decarboxylase activity);GO:0005737(cytoplasm);GO:0033387(putrescine biosynthetic process from ornithine)	00330(Arginine and proline metabolism);00480(Glutathione metabolism)	K01581	EC:4.1.1.17	PREDICTED: ornithine decarboxylase 1-like [Monomorium pharaonis]	8.14414	15.8119	10.2289	19.3859	32.3333	31.9249	-1.37627	0.0494905	0.779997	down	yes
MSTRG.17321	evm.TU.Contig307.53	chrContig307	+	1290736	1300800	9	1914	NA	NA	K03292	NA	PREDICTED: major facilitator superfamily domain-containing protein 12-like [Acyrthosiphon pisum]	2.25364	2.54191	0.41362	12.2731	7.76508	4.53341	-2.12575	0.0404035	0.779997	down	yes
MSTRG.17541	evm.TU.Contig31.86	chrContig31	+	2289903	2291387	1	1485	GO:0003674(molecular_function);GO:0005575(cellular_component);GO:0007420(brain development);GO:0009953(dorsal/ventral pattern formation);GO:0021551(central nervous system morphogenesis);GO:0060026(convergent extension)	NA	K12179	NA	COP9 signalosome complex subunit 6 [Zootermopsis nevadensis]	0	0	0	10.1256	11.3494	13.7018	-3.60398	0.000132501	0.313497	down	yes
MSTRG.17546	evm.TU.Contig31.90	chrContig31	-	2313655	2318536	4	1321	NA	00230(Purine metabolism)	K13485	EC:4.1.1.97	PREDICTED: 2-oxo-4-hydroxy-4-carboxy-5-ureidoimidazoline decarboxylase-like [Athalia rosae]	1.56467	3.46872	1.35705	4.20373	5.95596	4.4772	-1.22639	0.02244	0.779997	down	yes
MSTRG.17616	evm.TU.Contig31.150	chrContig31	-	3243217	3253395	9	1380	GO:0004648(O-phospho-L-serine:2-oxoglutarate aminotransferase activity);GO:0006564(L-serine biosynthetic process);GO:0008615(pyridoxine biosynthetic process)	00260(Glycine, serine and threonine metabolism);00680(Methane metabolism);00750(Vitamin B6 metabolism)	K00831	EC:2.6.1.52	putative phosphoserine aminotransferase [Zootermopsis nevadensis]	2.00248	1.73149	0.709171	29.552	17.0418	12.5127	-3.19561	0.00900886	0.738757	down	yes
MSTRG.18181	evm.TU.Contig32.145	chrContig32	+	2621239	2636552	3	750	NA	00230(Purine metabolism);04020(Calcium signaling pathway);04740(Olfactory transduction);04742(Taste transduction);04924(Renin secretion);05032(Morphine addiction)	K13755	EC:3.1.4.17	Dpse\GA13370-PA-like protein [Anopheles sinensis]	0	1.57636	0	1.2788	3.44839	0	-1.48935	0.0205088	0.779997	down	yes
MSTRG.18429	evm.TU.Contig325.21	chrContig325	-	199869	205154	4	1748	NA	NA	NA	NA	PREDICTED: serum response factor-binding protein 1-like [Acyrthosiphon pisum]	1.02414	0.972163	0.909747	2.9911	2.95292	2.60688	-1.00669	0.000296934	0.418944	down	yes
MSTRG.18791	evm.TU.Contig33457.1	chrContig33457	-	2	262	1	261	NA	NA	NA	NA	NA	2.02871	1.21827	0.375798	10.207	6.91094	4.13582	-2.1161	0.0307605	0.779997	down	yes
MSTRG.20174	evm.TU.Contig3602.5	chrContig3602	+	101876	103796	2	666	NA	NA	NA	NA	PREDICTED: uncharacterized protein LOC105680674 [Bombus impatiens]	0.014607	0	0	1.77461	0.884157	1.47843	-1.09679	0.00657757	0.723008	down	yes
MSTRG.20500	evm.TU.Contig37200.1	chrContig37200	+	683	2550	3	372	NA	NA	NA	NA	NA	10.9133	11.0983	6.76121	15.8066	32.0754	9.79177	-1.3709	0.00523795	0.715054	down	yes
MSTRG.22940	evm.TU.Contig447.15	chrContig447	-	449202	493162	4	5805	NA	04136(Autophagy - other eukaryotes);04138(Autophagy - yeast);04140(Autophagy - animal);04211(Longevity regulating pathway - mammal)	K08331	NA	Autophagy-related protein 13-like protein [Zootermopsis nevadensis]	0.549374	0.672408	0.954684	12.4994	3.92546	13.2139	-2.01919	0.0100446	0.741915	down	yes
MSTRG.23418	evm.TU.Contig456.7	chrContig456	-	71164	79186	5	2262	NA	00100(Steroid biosynthesis)	K00213	EC:1.3.1.21	7-dehydrocholesterol reductase [Zootermopsis nevadensis]	0	1.27312	0	3.91651	2.95736	0.750118	-1.79004	0.0494101	0.779997	down	yes
MSTRG.23501	evm.TU.Contig457.18	chrContig457	-	494915	507182	9	4347	NA	NA	K15005	EC:1.14.-.-	cytochrome P450 CYP418A2v3, partial [Laodelphax striatella]	0.348889	0.542752	1.25023	10.4238	189.014	0.791872	-5.04848	0.0458377	0.779997	down	yes
MSTRG.23551	evm.TU.Contig458.13	chrContig458	+	181256	195658	8	1112	GO:0005743(mitochondrial inner membrane);GO:0005749(mitochondrial respiratory chain complex II, succinate dehydrogenase complex (ubiquinone));GO:0048039(ubiquinone binding);GO:0051537(2 iron, 2 sulfur cluster binding);GO:0051538(3 iron, 4 sulfur cluster binding);GO:0051539(4 iron, 4 sulfur cluster binding)	00020(Citrate cycle (TCA cycle));00190(Oxidative phosphorylation);04932(Non-alcoholic fatty liver disease (NAFLD));05010(Alzheimer's disease);05012(Parkinson's disease);05016(Huntington's disease)	K00235	EC:1.3.5.1	PREDICTED: succinate dehydrogenase [ubiquinone] iron-sulfur subunit, mitochondrial [Ceratitis capitata]	0.238348	0.365473	0.471869	2.24094	1.99929	5.39174	-1.24916	0.0290401	0.779997	down	yes
MSTRG.24148	evm.TU.Contig48.25	chrContig48	+	462680	485342	8	1909	NA	NA	K12171	EC:2.3.2.27	Putative E3 ubiquitin-protein ligase SH3RF1 [Zootermopsis nevadensis]	1.35934	2.53882	0.561692	3.26174	3.88688	1.82756	-1.13466	0.025732	0.779997	down	yes
MSTRG.24163	evm.TU.Contig48.36	chrContig48	+	846934	862378	7	2070	GO:0008532(N-acetyllactosaminide beta-1,3-N-acetylglucosaminyltransferase activity)	00533(Glycosaminoglycan biosynthesis - keratan sulfate);00601(Glycosphingolipid biosynthesis - lacto and neolacto series)	K00741	EC:2.4.1.149	hypothetical protein L798_11452 [Zootermopsis nevadensis]	1.7563	5.246	0.547016	0.870812	16.4225	0.714849	-1.70633	0.0385755	0.779997	down	yes
MSTRG.24428	evm.TU.Contig486.7	chrContig486	+	125329	125502	1	174	GO:0000276(mitochondrial proton-transporting ATP synthase complex, coupling factor F(o));GO:0015986(ATP synthesis coupled proton transport);GO:0015991(ATP hydrolysis coupled proton transport);GO:0015992(proton transport);GO:0046933(proton-transporting ATP synthase activity, rotational mechanism)	00190(Oxidative phosphorylation);05010(Alzheimer's disease);05012(Parkinson's disease);05016(Huntington's disease)	K02128	NA	ATP synthase subunit c [Manduca sexta]	0.260611	0.545993	0	1.40366	4.37837	0	-1.68808	0.0128179	0.765052	down	yes
MSTRG.24834	evm.TU.Contig498.34	chrContig498	+	646338	648915	2	2042	NA	00900(Terpenoid backbone biosynthesis);04146(Peroxisome)	K00869	EC:2.7.1.36	PREDICTED: mevalonate kinase [Plutella xylostella]	0.651214	0.020525	0.140169	1.79692	2.16615	2.1935	-1.26618	0.0220054	0.779997	down	yes
MSTRG.25951	evm.TU.Contig555.34	chrContig555	-	428101	436124	6	768	GO:0052689(carboxylic ester hydrolase activity)	00983(Drug metabolism - other enzymes)	K03927	EC:3.1.1.1 3.1.1.84 3.1.1.56	carboxylesterase [Laodelphax striatella]	0.21226	0.214496	0.069643	0.346348	2.3862	0.5045	-1.10031	0.0434741	0.779997	down	yes
MSTRG.26448	evm.TU.Contig58.156	chrContig58	-	2802422	2828843	16	2470	GO:0000976(transcription regulatory region sequence-specific DNA binding);GO:0003700(transcription factor activity, sequence-specific DNA binding);GO:0005634(nucleus);GO:0006349(regulation of gene expression by genetic imprinting);GO:0007379(segment specification);GO:0043007(maintenance of rDNA);GO:0043035(chromatin insulator sequence binding);GO:0043565(sequence-specific DNA binding);GO:0045892(…	NA	K09228	NA	Transcriptional repressor CTCF [Zootermopsis nevadensis]	0.5574	0	0	14.9816	4.02978	7.52285	-2.64529	0.0234387	0.779997	down	yes
MSTRG.27050	evm.TU.Contig623.18	chrContig623	+	412129	420247	3	1174	NA	NA	NA	NA	NA	1.82694	1.36125	0.525675	4.13925	6.29603	3.0141	-1.63995	0.00872191	0.738757	down	yes
MSTRG.27346	evm.TU.Contig64.32	chrContig64	+	781318	802544	8	2207	GO:0004307(ethanolaminephosphotransferase activity);GO:0008654(phospholipid biosynthetic process);GO:0016020(membrane)	00440(Phosphonate and phosphinate metabolism);00564(Glycerophospholipid metabolism);00565(Ether lipid metabolism)	K00993	EC:2.7.8.1	PREDICTED: choline/ethanolaminephosphotransferase 1 isoform X3 [Fopius arisanus]	0	15.3196	0	36.6989	46.1272	20.7961	-4.73701	0.0444472	0.779997	down	yes
MSTRG.28630	evm.TU.Contig70.17	chrContig70	+	216840	222448	6	1602	GO:0004846(urate oxidase activity);GO:0005777(peroxisome);GO:0006144(purine nucleobase metabolic process);GO:0019428(allantoin biosynthetic process);GO:0045471(response to ethanol);GO:0055114(oxidation-reduction process)	00230(Purine metabolism);00232(Caffeine metabolism)	K00365	EC:1.7.3.3	AAEL002194-PA [Aedes aegypti]	130.427	231.101	140.994	220.9	364.979	243.638	-1.04011	0.0313164	0.779997	down	yes
MSTRG.28934	evm.TU.Contig71.115	chrContig71	+	1928041	2068636	10	1624	NA	NA	K17233	NA	Fasciclin-2 precursor, putative [Pediculus humanus corporis]	5.8022	6.36887	3.48541	12.0847	18.3967	6.04711	-1.51423	0.00508373	0.713666	down	yes
MSTRG.29918	evm.TU.Contig78.115	chrContig78	+	1911551	1962506	7	2196	GO:0005267(potassium channel activity);GO:0016021(integral component of membrane);GO:0046982(protein heterodimerization activity);GO:0071805(potassium ion transmembrane transport)	04925(Aldosterone synthesis and secretion)	K04919	NA	PREDICTED: two pore potassium channel protein sup-9 [Athalia rosae]	0.003367	0.066189	0	0.63603	1.89374	0.014374	-1.16169	0.0242144	0.779997	down	yes
MSTRG.30293	evm.TU.Contig79.44_evm.TU.Contig79.45	chrContig79	+	861555	882173	12	1463	NA	00220(Arginine biosynthesis);00250(Alanine, aspartate and glutamate metabolism);00710(Carbon fixation in photosynthetic organisms)	K00814	EC:2.6.1.2	alanine aminotransferase 1 [Sogatella furcifera]	1.25607	2.80205	0.872246	1.65303	9.46849	0.295449	-1.42469	0.0151945	0.779997	down	yes
MSTRG.30416	evm.TU.Contig792.2_evm.TU.Contig792.3	chrContig792	-	13222	40057	13	3842	GO:0004842(ubiquitin-protein transferase activity);GO:0005634(nucleus);GO:0005737(cytoplasm);GO:0019915(lipid storage);GO:0042787(protein ubiquitination involved in ubiquitin-dependent protein catabolic process)	04120(Ubiquitin mediated proteolysis);04144(Endocytosis)	K05633	EC:2.3.2.26	E3 ubiquitin-protein ligase Su(dx) [Zootermopsis nevadensis]	0.086222	0.321794	0	1.21956	3.32467	0.381336	-1.60247	0.0040337	0.679182	down	yes
MSTRG.31794	evm.TU.Contig86.20	chrContig86	-	738715	826377	7	10172	NA	05205(Proteoglycans in cancer)	K09108	NA	Transcription factor AP-4, partial [Zootermopsis nevadensis]	0.026947	0.583562	0.006279	3.52952	5.12196	1.67328	-2.27148	0.00118225	0.536951	down	yes
MSTRG.32441	evm.TU.Contig901.29	chrContig901	-	148418	155557	2	6951	NA	04213(Longevity regulating pathway - multiple species)	K03695	NA	nad-dependent glutamate dehydrogenase [Wolbachia endosymbiont of Diaphorina citri]	0	0	0	2.81346	1.60154	3.94934	-1.6104	0.00322255	0.641075	down	yes
MSTRG.33296	evm.TU.Contig949.6	chrContig949	+	19519	24991	2	2778	NA	NA	NA	NA	PREDICTED: microtubule-associated protein futsch isoform X2 [Acyrthosiphon pisum]	0.068783	0.09074	0.054887	1.64454	3.14782	0.101114	-1.62307	0.0320195	0.779997	down	yes
MSTRG.33420	evm.TU.Contig967.5	chrContig967	+	72910	75606	3	750	NA	NA	K19673	NA	Tetratricopeptide repeat protein 21B [Zootermopsis nevadensis]	0.096323	0.348284	0.195807	2.97783	1.82928	2.59416	-1.42491	0.00607241	0.715054	down	yes
